# Supplementary material for: Exploring the molecular landscape of multicomponent crystals formed by naproxen drug and acridines
Source: Royal Society of Chemistry journal article supplement (doi:10.1039/d2ce00890d), 2022-01-01
Supplement: d2ce00890d1.pdf [file d2ce00890d1.pdf]

## Supporting information

### Exploring the polymorphic landscape of molecular complexes between naproxen drug and acridines

Artur Mirocki<sup>1</sup>, Mattia Lopresti<sup>2</sup>, Luca Palin<sup>2,3</sup>, Eleonora Conterosito<sup>2</sup>, Artur Sikorski<sup>1</sup>, Marco Milanese<sup>2,\*</sup>

<sup>1</sup> Faculty of Chemistry of the University of Gdansk, ul. Wita Stwosza 63, 80-308 Gdansk, Poland

<sup>2</sup> Università del Piemonte Orientale, Dipartimento di Scienze e Innovazione Tecnologica, Viale T. Michel 11, 15121 Alessandria, Italy

<sup>3</sup> Nova Res s.r.l., Via D. Bello 3, 28100 Novara, Italy

e-mail corresponding author: marco.milanese@uniupo.it

#### Crystallographic data

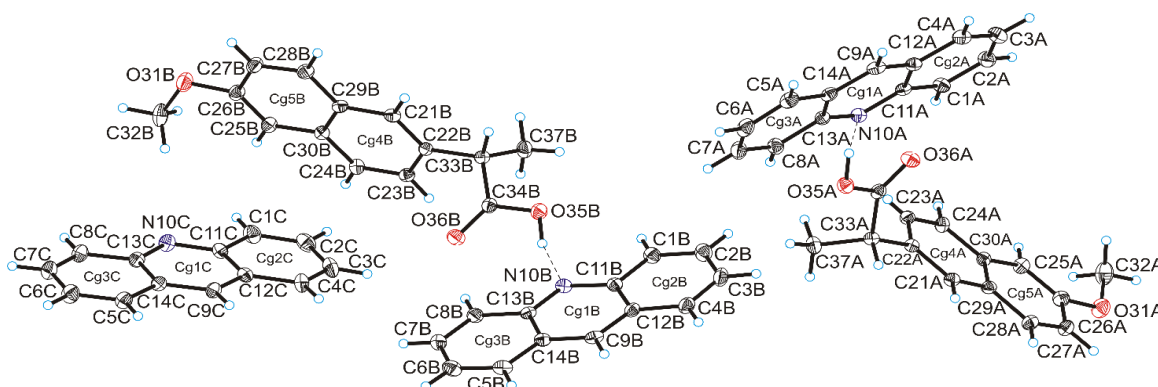

**Table 1S.** Crystal data and structure refinement for molecular crystals 1 $\alpha$  and 2 $\alpha$ .

| Compound                                                         | 1 $\alpha$                                                    | 2 $\alpha$                                                    |
|------------------------------------------------------------------|---------------------------------------------------------------|---------------------------------------------------------------|
| Chemical formula                                                 | C <sub>67</sub> H <sub>55</sub> N <sub>3</sub> O <sub>6</sub> | C <sub>41</sub> H <sub>40</sub> N <sub>2</sub> O <sub>7</sub> |
| Formula weight/g·mol <sup>-1</sup>                               | 998.14                                                        | 672.75                                                        |
| Crystal system                                                   | monoclinic                                                    | monoclinic                                                    |
| Space group                                                      | <i>P</i> 2 <sub>1</sub>                                       | <i>P</i> 2 <sub>1</sub>                                       |
| <i>a</i> /Å                                                      | 17.3435(14)                                                   | 10.0768(11)                                                   |
| <i>b</i> /Å                                                      | 5.9437(6)                                                     | 6.2918(5)                                                     |
| <i>c</i> /Å                                                      | 25.672(2)                                                     | 27.347(3)                                                     |
| $\alpha$ /°                                                      | 90                                                            | 90                                                            |
| $\beta$ /°                                                       | 101.975(9)                                                    | 98.004(11)                                                    |
| $\gamma$ /°                                                      | 90                                                            | 90                                                            |
| V/Å <sup>3</sup>                                                 | 2588.8(4)                                                     | 1717.0(3)                                                     |
| Z                                                                | 2                                                             | 2                                                             |
| T/K                                                              | 295(2)                                                        | 295(2)                                                        |
| $\lambda_{Mo}$ /Å                                                | 0.71073                                                       | 0.71073                                                       |
| $\rho_{calc}$ /g·cm <sup>-3</sup>                                | 1.280                                                         | 1.301                                                         |
| F(000)                                                           | 1052                                                          | 712                                                           |
| $\mu$ /mm <sup>-1</sup>                                          | 0.082                                                         | 0.089                                                         |
| $\theta$ range/°                                                 | 3.25-25.00                                                    | 3.32-25.00                                                    |
| Completeness $\theta$ /%                                         | 99.7                                                          | 99.7                                                          |
| Reflections collected                                            | 18978                                                         | 11483                                                         |
| Reflections                                                      | 7896                                                          | 5516                                                          |
| unique                                                           | [R <sub>int</sub> = 0.0837]                                   | [R <sub>int</sub> = 0.0978]                                   |
| Data/restraints/parameters                                       | 7896/4/695                                                    | 5516/7/473                                                    |
| Goodness of fit on <i>F</i> <sup>2</sup>                         | 0.955                                                         | 0.939                                                         |
| Final R <sub>1</sub> value ( <i>I</i> >2 $\sigma$ ( <i>I</i> ))  | 0.0585                                                        | 0.0677                                                        |
| Final wR <sub>2</sub> value ( <i>I</i> >2 $\sigma$ ( <i>I</i> )) | 0.0927                                                        | 0.0843                                                        |
| Final R <sub>1</sub> value (all data)                            | 0.1578                                                        | 0.1928                                                        |
| Final wR <sub>2</sub> value (all data)                           | 0.1231                                                        | 0.1174                                                        |
| CCDC number                                                      | 2168756                                                       | 2168757                                                       |

**Table 2S.** Hydrogen-bond geometry for molecular crystals 1 $\alpha$ , 1 $\beta$  and 2 $\alpha$ .

| Compound                                        | D–H $\cdots$ A                       | d(D–H)[Å] | d(H $\cdots$ A)[Å] | d(D $\cdots$ A)[Å] | $\angle$ D–H $\cdots$ A [°] |
|-------------------------------------------------|--------------------------------------|-----------|--------------------|--------------------|-----------------------------|
| 1 $\alpha$                                      | O35A–H35A $\cdots$ N10A              | 1.00(5)   | 1.80(6)            | 2.743(8)           | 157(5)                      |
|                                                 | O35B–H35B $\cdots$ N10B              | 0.98(6)   | 1.89(6)            | 2.810(7)           | 156(6)                      |
|                                                 | C8B–H8B $\cdots$ O36B                | 0.93      | 2.40               | 3.303(9)           | 164                         |
|                                                 | C33A–H33A $\cdots$ N10A <sup>i</sup> | 0.98      | 2.61               | 3.573(9)           | 166                         |
|                                                 | C37A–H37B $\cdots$ O36A <sup>i</sup> | 0.96      | 2.45               | 3.317(9)           | 150                         |
| Symmetry code : (i) x, -1+y, z.                 |                                      |           |                    |                    |                             |
| 1 $\beta$                                       | OH $\cdots$ N                        | 0.822     | 1.847              | 3.385              | 131                         |
|                                                 | C9AH9 $\cdots$ O30                   | 0.932     | 2.633              | 3.525              | 160                         |
| 2 $\alpha$                                      | N10–H10 $\cdots$ O1W                 | 0.97(5)   | 1.48(6)            | 2.427(9)           | 165(9)                      |
|                                                 | N15–H15B $\cdots$ O36A <sup>i</sup>  | 0.89(9)   | 1.97(9)            | 2.857(9)           | 178(9)                      |
|                                                 | O1W–H1W $\cdots$ O36B <sup>ii</sup>  | 0.91(3)   | 1.83(5)            | 2.717(9)           | 164(7)                      |
|                                                 | O1W–H2W $\cdots$ O35B                | 1.00(8)   | 1.75(8)            | 2.742(9)           | 169(5)                      |
|                                                 | O35A–H35A $\cdots$ O35B              | 0.90(9)   | 1.87(9)            | 2.511(9)           | 127(9)                      |
|                                                 | C23B–H23B $\cdots$ O36B              | 0.93      | 2.53               | 3.418(9)           | 160                         |
| Symmetry code: (i) -1+x, y, z; (ii) x, -1+y, z. |                                      |           |                    |                    |                             |

**Table 3S.** C–H $\cdots$  $\pi$  interactions geometry for molecular crystals 1 $\alpha$ , 1 $\beta$  and 2 $\alpha$ .

| Compound                                                                                                                                  | D–H $\cdots$ A                        | d(H $\cdots$ A) [Å] | d(C $\cdots$ Cg) [Å] | $\angle$ D–H $\cdots$ A [°] |
|-------------------------------------------------------------------------------------------------------------------------------------------|---------------------------------------|---------------------|----------------------|-----------------------------|
| 1 $\alpha$                                                                                                                                | C2A–H2A $\cdots$ Cg3C <sup>ii</sup>   | 2.96                | 3.723(9)             | 140                         |
|                                                                                                                                           | C2C–H2C $\cdots$ Cg4B                 | 2.93                | 3.706(9)             | 141                         |
|                                                                                                                                           | C5C–H5C $\cdots$ Cg1C <sup>iii</sup>  | 2.90                | 3.529(8)             | 126                         |
|                                                                                                                                           | C9B–H9B $\cdots$ Cg5A <sup>iv</sup>   | 2.92                | 3.678(8)             | 140                         |
|                                                                                                                                           | C28A–H28A $\cdots$ Cg1B <sup>v</sup>  | 2.94                | 3.545(6)             | 124                         |
|                                                                                                                                           | C32A–H32C $\cdots$ Cg4A <sup>v</sup>  | 2.89                | 3.693(8)             | 142                         |
|                                                                                                                                           | C33A–H33A $\cdots$ Cg1A <sup>i</sup>  | 2.97                | 3.818(8)             | 145                         |
|                                                                                                                                           | C33B–H33B $\cdots$ Cg3A <sup>vi</sup> | 2.94                | 3.810(6)             | 149                         |
| 1 $\beta$                                                                                                                                 | C7AH $\cdots$ C4 (T-like)             | 2.683               | 3.515                | 149                         |
| Symmetry code: (i) x, -1+y, z; (ii) x, y, -1+z; (iii) 2-x, 1/2+y, 2-z; (iv) 2-x, 3/2+y, 1-z; (v) 2-x, -1/2+y, 1-z; (vi) 1-x, -1/2+y, 1-z. |                                       |                     |                      |                             |

|            |                                       |      |          |     |
|------------|---------------------------------------|------|----------|-----|
| 2 $\alpha$ | C2–H2 $\cdots$ Cg4B <sup>iii</sup>    | 2.56 | 3.335(9) | 141 |
|            | C6–H6 $\cdots$ Cg4A                   | 2.60 | 3.388(9) | 142 |
|            | C28B–H28B $\cdots$ Cg5B <sup>iv</sup> | 2.74 | 3.491(8) | 138 |

Symmetry code: (iii)  $-1+x, -1+y, z$ ; (iv)  $2-x, 1/2+y, -z$ .

Cg represents the centre of gravity of the rings as follows: Cg1A ring N(10A)-C(12A)/C(9A)/C(14A)/C(13A), Cg1B ring N(10B)-C(12B)/C(9B)/C(14B)/C(13B), Cg1C ring N(10C)-C(12C)/C(9C)/C(14C)/C(13C), Cg3A ring C(5A)-C(8A)/C(13A)/C(14A), Cg3C ring C(5C)-C(8C)/C(13C)/C(14C), Cg4A ring C(21A)-C(24A)/C(30A)/C(29A), Cg4B ring C(21B)-C(24B)/C(30B)/C(29B), Cg5A ring C(25A)-C(30A) for compound 1 $\alpha$ , and Cg4A ring C(21A)-C(24A)/C(30A)/C(29A), Cg4B ring C(21B)-C(24B)/C(30B)/C(29B), Cg5B ring C(25B)-C(30B) for compound 2 $\alpha$ .

**Table 4S.**  $\pi$ - $\pi$  interactions geometry for molecular crystals 2 $\alpha$ .

| Compound   | CgI <sup>a</sup> | CgJ <sup>a</sup>  | CgI $\cdots$ CgJ <sup>b</sup><br>[Å] | Dihedral<br>angle <sup>c</sup> [°] | Interplanar<br>distance <sup>d</sup> [Å] | Offset <sup>e</sup><br>[Å] |
|------------|------------------|-------------------|--------------------------------------|------------------------------------|------------------------------------------|----------------------------|
| 2 $\alpha$ | Cg1              | Cg3 <sup>ii</sup> | 3.499(6)                             | 1.8(5)                             | 3.445(4)                                 | 0.713                      |

Symmetry code: (ii)  $x, -1+y, z$ .

<sup>a</sup> Cg represents the centre of gravity of the rings as follows: Cg1 ring C(1)-C(4)/C(12)/C(11), Cg3 ring C(5)-C(8)/C(13)/C(14). <sup>b</sup> Cg $\cdots$ Cg is the distance between ring centroids. <sup>c</sup> The dihedral angle is that between the mean planes of CgI and CgJ. <sup>d</sup> The interplanar distance is the perpendicular distance from CgI to ring J. <sup>e</sup> The offset is the perpendicular distance from ring I to ring J.

### Thermogravimetric data

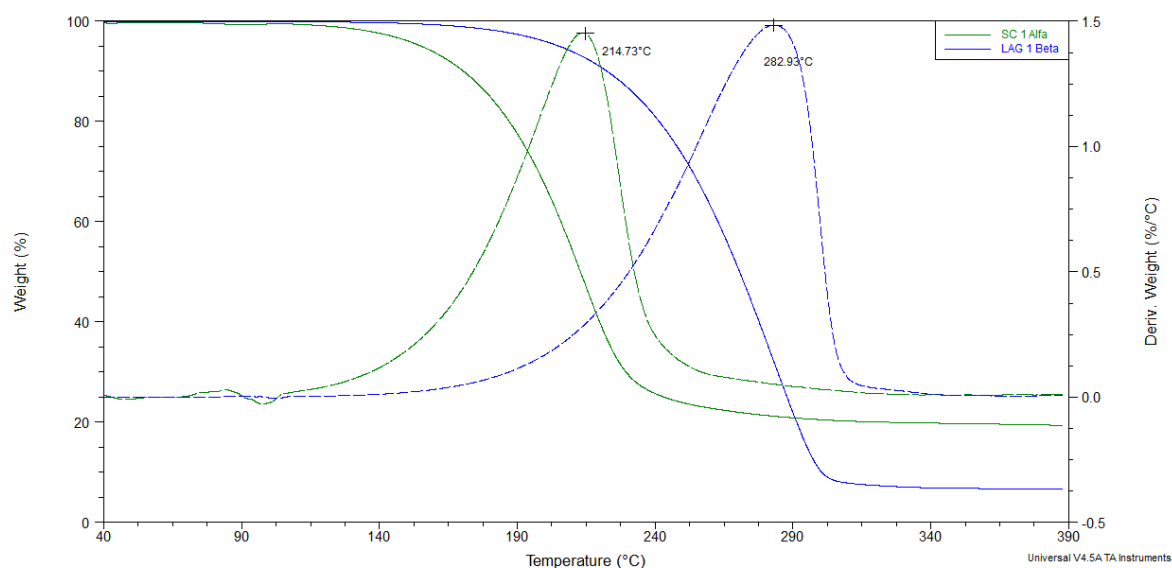

**Figure 3S.** TGA data of 1 $\alpha$  and 1 $\beta$  phases.

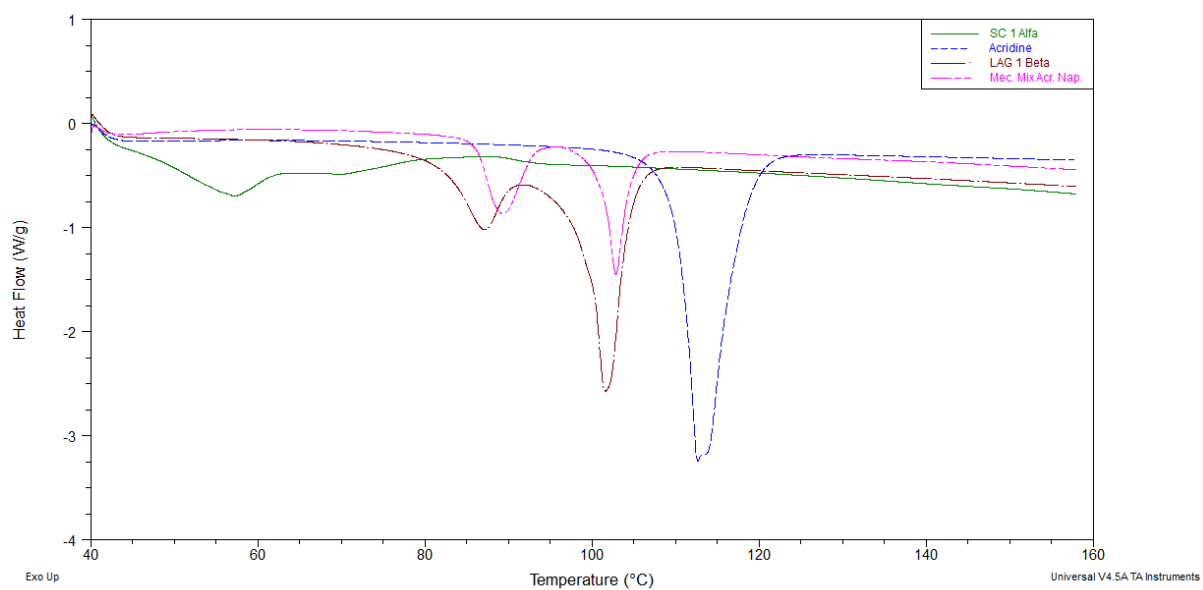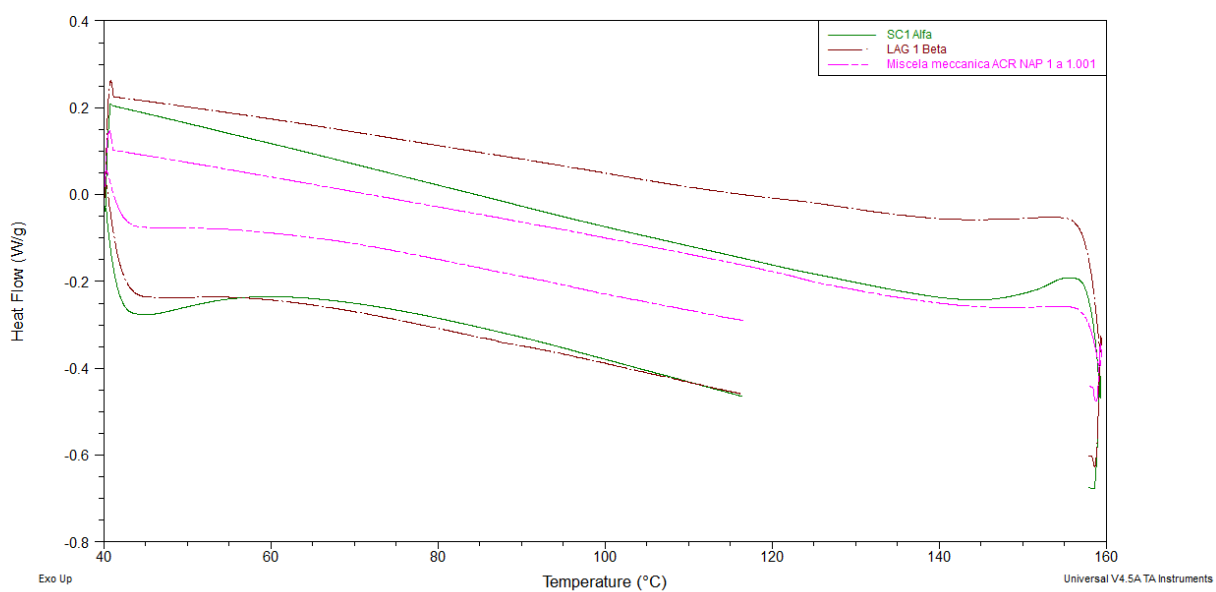

**Figure 4S.** DSC data of the stoichiometric 1:1 mechanical mixture of naproxen with acridine compared to  $1\alpha$  and  $1\beta$  melting (top) and cooling and second heating (bottom) and with 9-aminoacridine (bottom); Acridine alone heating profile is also reported to highlight that all the signals are below its melting point (naproxen melt at  $165^{\circ}\text{C}$ ).

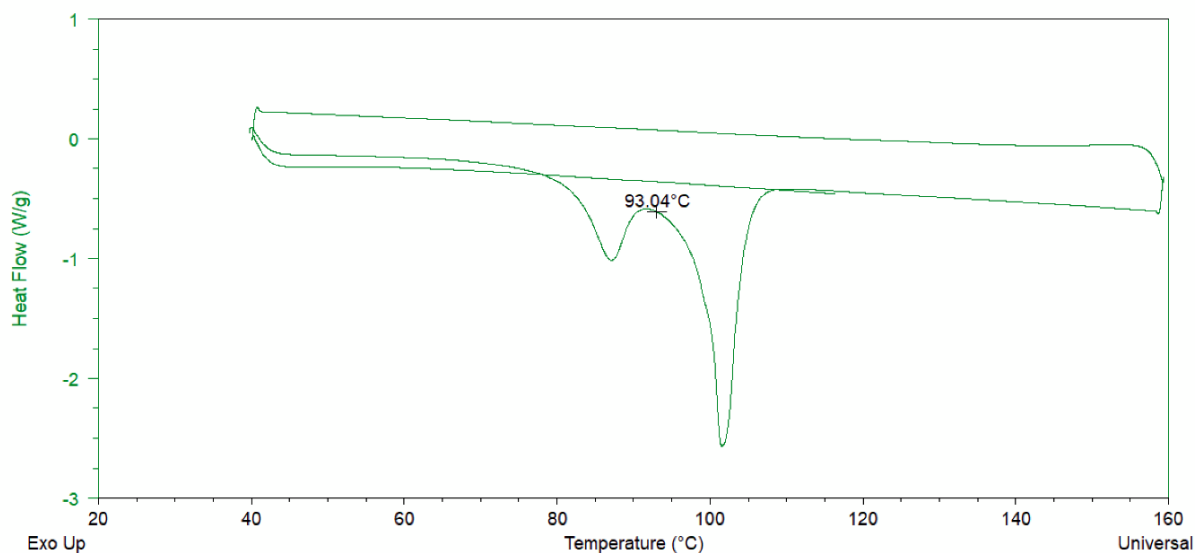

**Figure 5S.** DSC data of  $1\beta$  molecular complex.

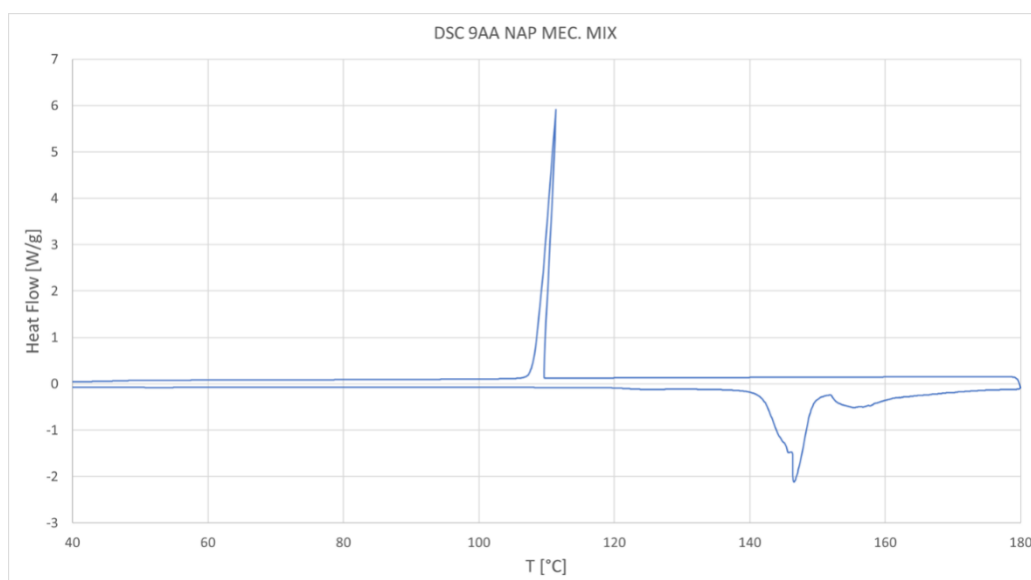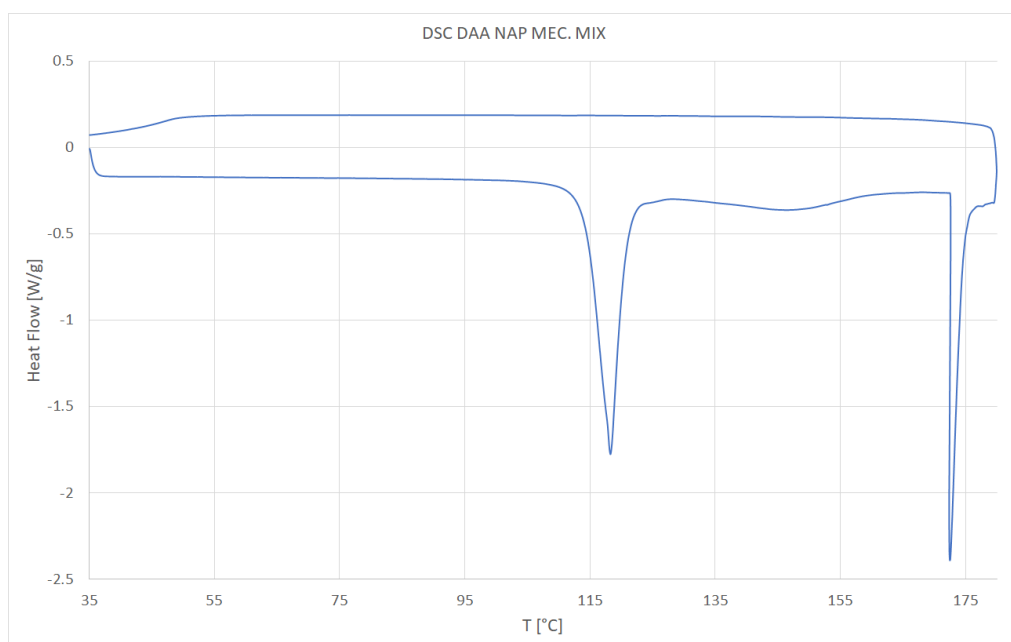

**Figure 6S.** DSC data of the stoichiometric 1:1 mechanical mixture of naproxen with 9-aminoacridine (top) and with 6,9-diamino-2-ethoxyacridine (bottom).

*Powder diffraction data*

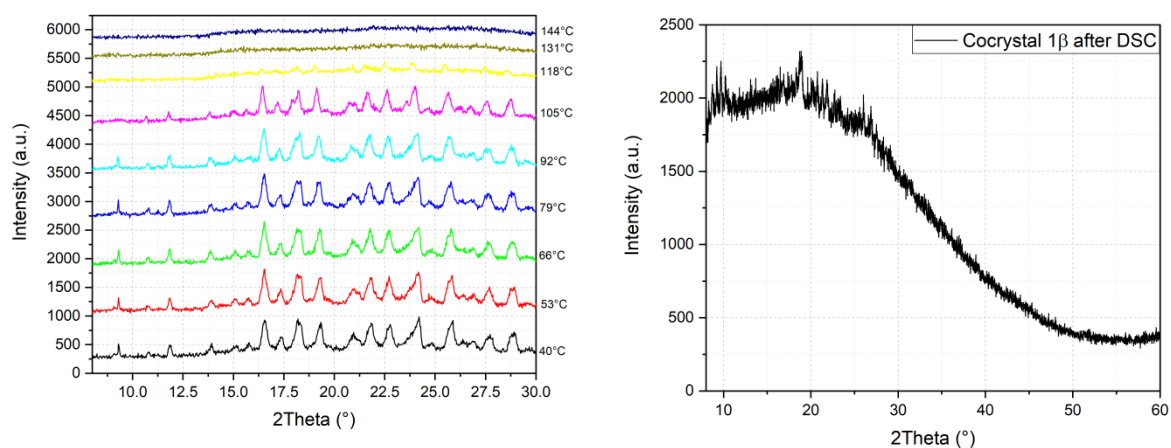

**Figure 7S.** In situ XRPD data from RT to 160°C of phase 1β (left) and XRPD pattern measured on 1β sample after cooling, showing its amorphous behaviour (right).

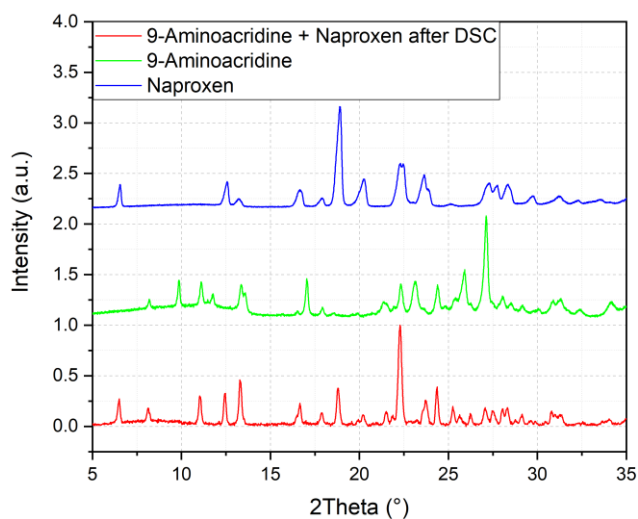

**Figure 8S.** XRPD pattern of mechanical mixture of 9-aminoacridine (green) and naproxen (blue) after DSC. The resulting curve is compared to the XRPD patterns of the pure reactants (red).

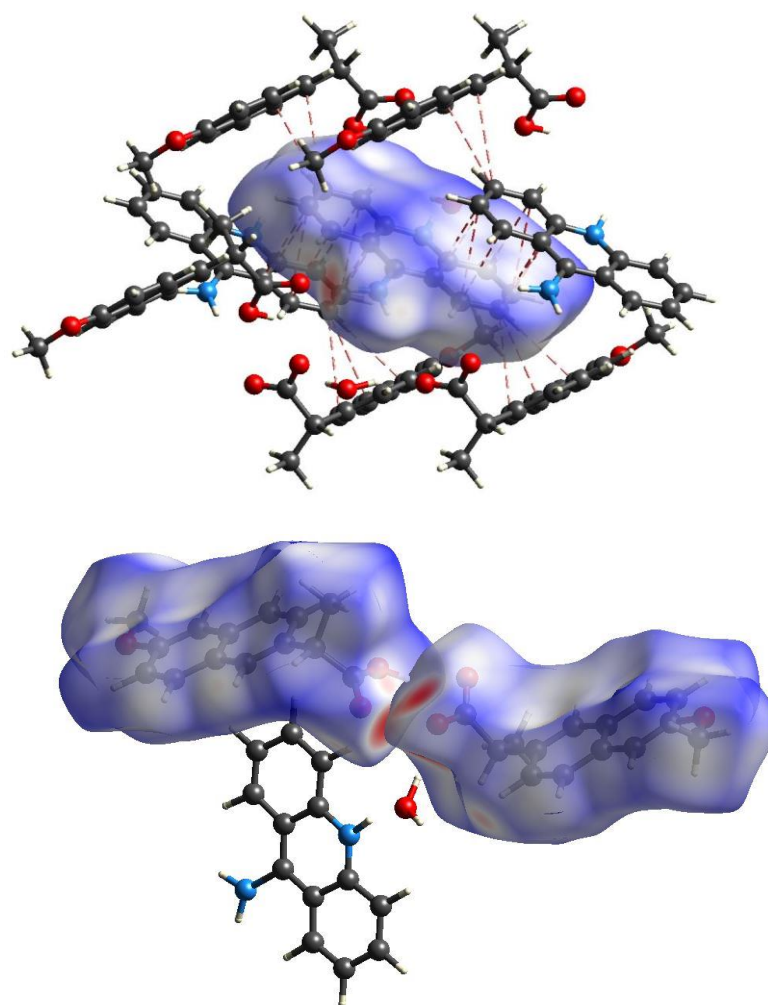

**Figure 9S.** Views of Hirshfeld surfaces for  $2a$  with d-norm plotted evidencing the relevant interactions. Some molecules were omitted for clarity.



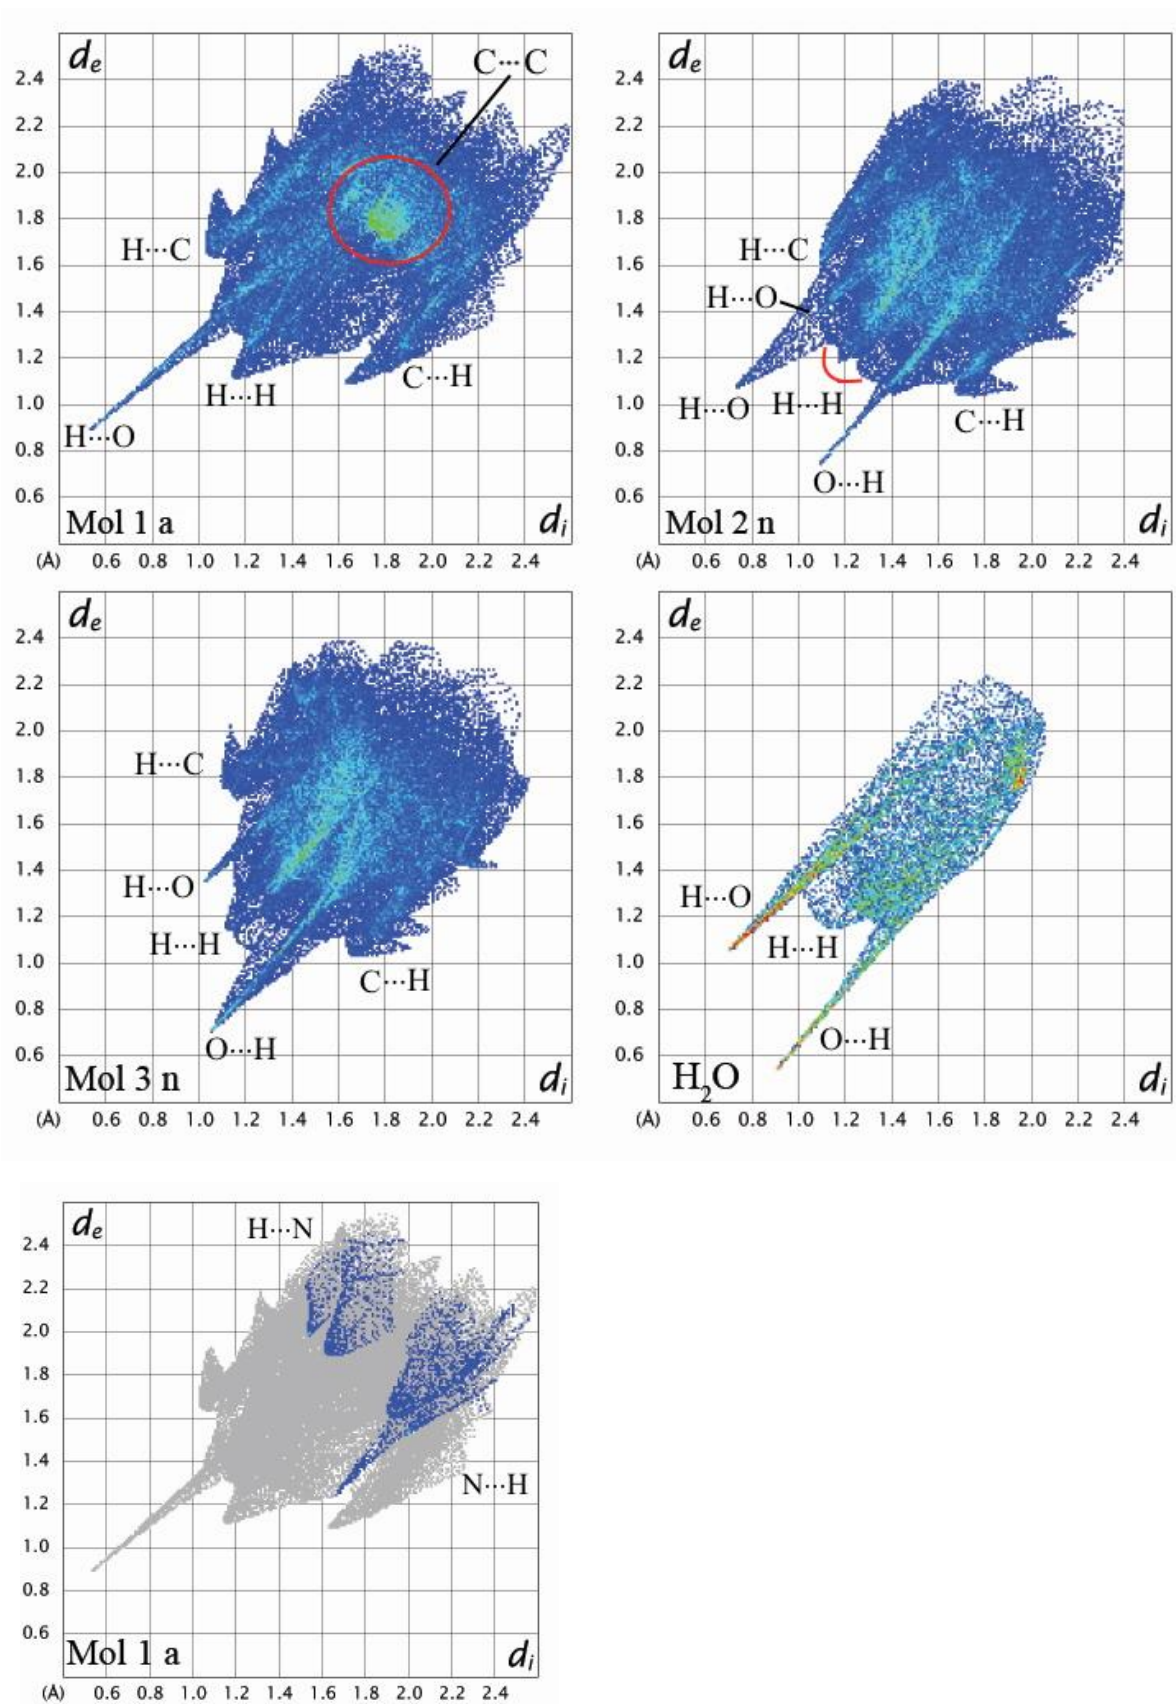

**Figure 10S.** Fingerprint plots for 9-aminoacridine (Mol\_1\_a), naproxen (Mol\_2\_n), deprotonated naproxen (Mol\_3\_n) and water in  $2\alpha$ . At the bottom, again the fingerprint plot of Mol\_1\_a filtered by element to show  $N \cdots H$  interactions.

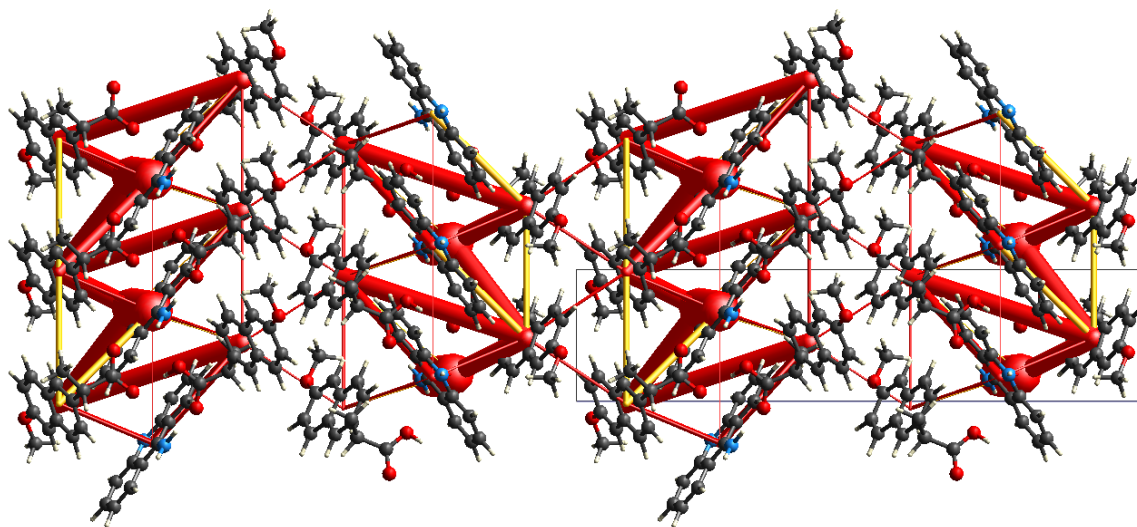

Coulomb energy; view along a

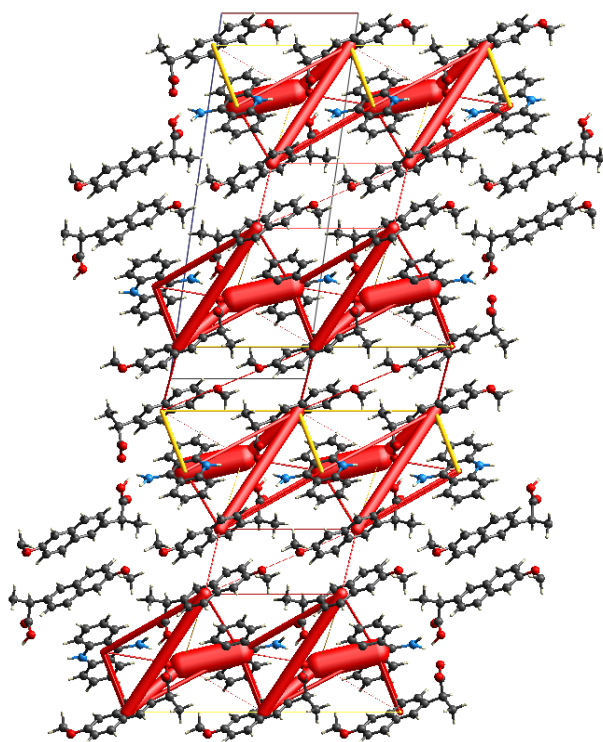

Coulomb energy; view along b

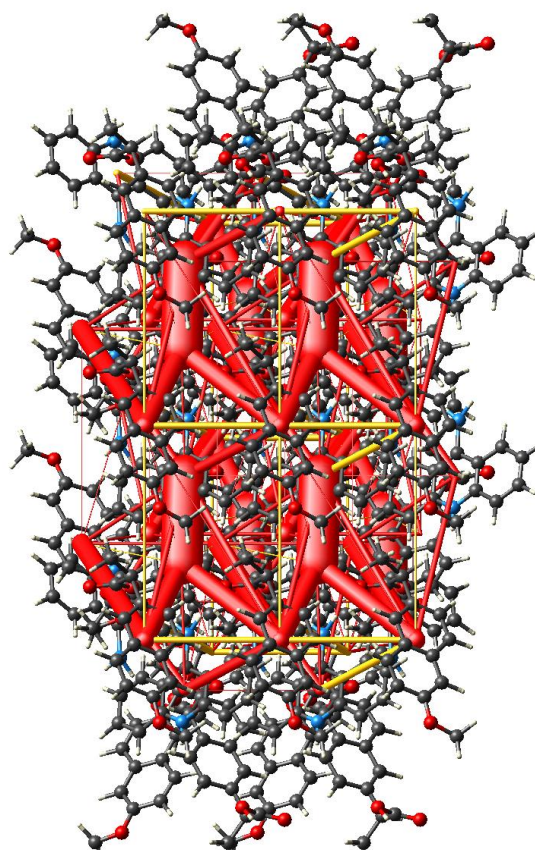

Coulomb energy; view along c

**Figure 11S.** Energy frameworks for  $2\alpha$  viewed along a, b and c. Attractive coulomb forces in red, repulsive coulomb forces in yellow. The unit cell is drawn in black. Tube size was set to 80 and cutoff energy to 0.00 kJ/mol.



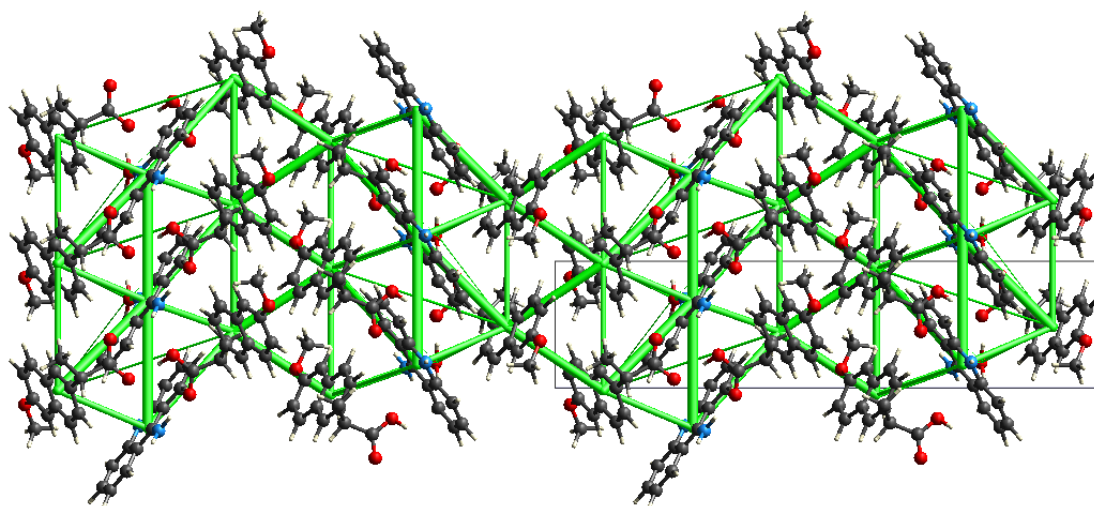

Dispersion energy; view along a

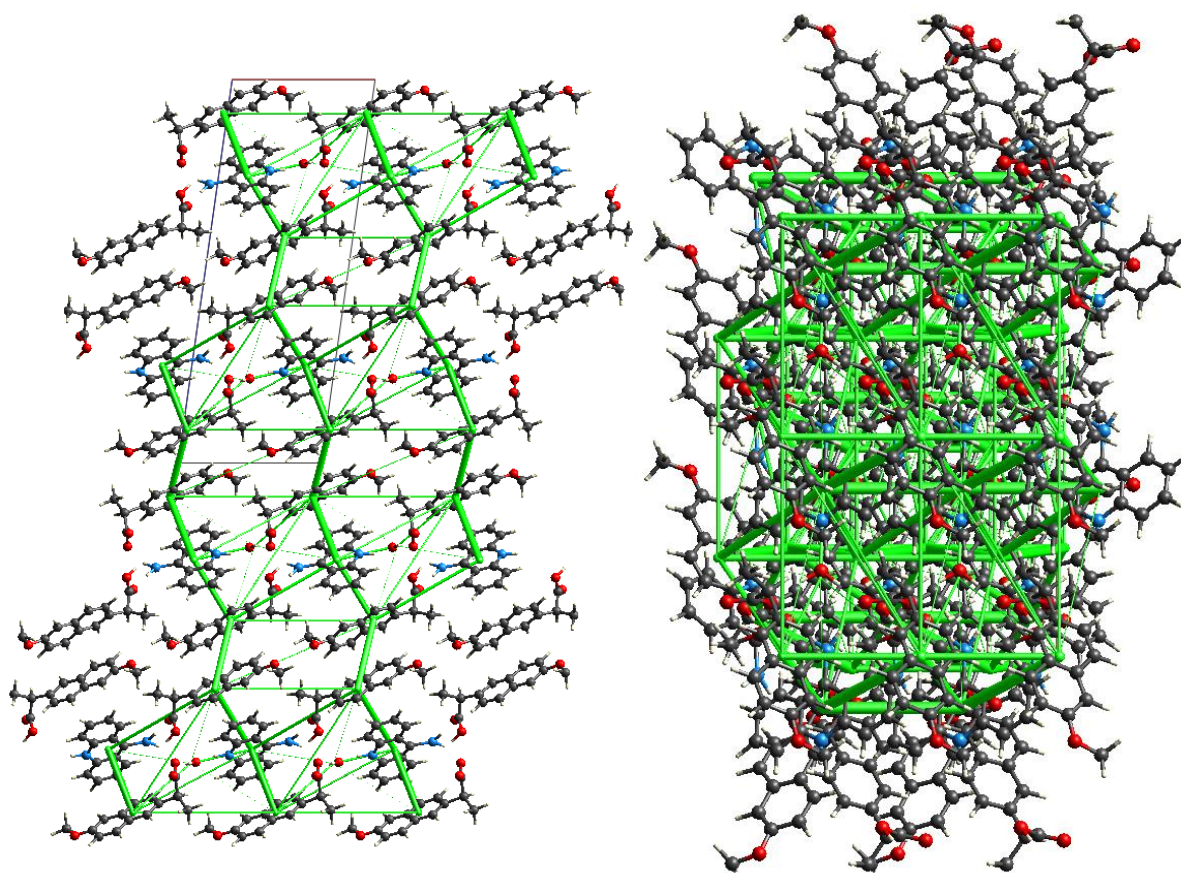

Dispersion energy; view along b

Dispersion energy; view along c

**Figure 12S.** Energy frameworks for  $2\alpha$  viewed along a, b and c. Dispersive forces are drawn in green. The unit cell is drawn in black. Tube size was set to 80 and cutoff energy to 0.00 kJ/mol.
